# Supplementary material for: Virtual professional development on conflict management for school leaders
Source: Frontiers journal article supplement (doi:10.3389/feduc.2022.849278), 2022-07-22
Supplement: Data_Sheet_1.pdf [file Data_Sheet_1.pdf]

## **Appendix A**

### **Pre-survey**

#### **Section A.**

1. Please indicate the racial/ethnic category with which you most identify yourself.  
American Indian or Alaska Native  
Hispanic or Latino  
Asian  
Black or African American  
Native Hawaiian or Other Pacific Islander  
White  
Other \_\_\_\_\_
2. How long you have been in the current position  
Less than 3 months  
Between 3 months and 1 year  
1 year but less than 3 years  
Between 3 years and under 5 years  
Between 5 years and less than 10 year  
More than 11 year
3. Please indicate your gender.  
Male  
Female

**Section B.**

Which 5 words would you most closely associate with the word "conflict"? There may be more than 5 words you associate with "conflict", but choose five words you most strongly associate with "conflict".

Engage  
Neutral  
Listener  
Avoid  
Perception  
Constructive  
Destructive  
Beliefs  
Win  
Lose  
Ideas  
Culture  
Reasonable  
Agreement  
Discussion  
Viewpoints  
Dialogue  
Embrace  
Advocate  
Biases  
Collaboration  
Resistance  
Fight

### **Section C.**

**Read each statement and indicate your level of confidence that in following areas:**

---

|  | Strongly<br>Disagree | Disagree | Neutral | Agree | Strongly<br>Agree |
|--|----------------------|----------|---------|-------|-------------------|
|--|----------------------|----------|---------|-------|-------------------|

---

|                                                                                                                                       |  |  |  |  |  |
|---------------------------------------------------------------------------------------------------------------------------------------|--|--|--|--|--|
| 1. I am confident in my general knowledge regarding the role of Emotional Intelligence in effective school leadership and management. |  |  |  |  |  |
| 2. I am confident in my knowledge regarding critical dialogue.                                                                        |  |  |  |  |  |
| 3. I am confident in my knowledge regarding culturally responsive interventions.                                                      |  |  |  |  |  |
| 4. I am confident in making culturally responsive decisions.                                                                          |  |  |  |  |  |
| 5. I know how to address cultural tensions that arise within the school.                                                              |  |  |  |  |  |
| 6. I am confident in my knowledge regarding outcomes that are associated with school climate.                                         |  |  |  |  |  |
| 7. I know how to facilitate critical dialogue in school settings.                                                                     |  |  |  |  |  |
| 8. I know how to engage in difficult dialogue on bullying and/or peer-directed aggressions.                                           |  |  |  |  |  |

---
