# Supplementary material for: Virtual professional development on conflict management for school leaders
Source: Frontiers journal article supplement (doi:10.3389/feduc.2022.849278), 2022-07-22
Supplement: Data_Sheet_2.pdf [file Data_Sheet_2.pdf]

## Appendix B

### Post-survey

#### **Section A.**

**Read each statement and choose the answer that best matches your opinion.**

|                                                                                                                                        | Strongly<br>Disagree | Disagree | Neutral | Agree | Strongly<br>Agree |
|----------------------------------------------------------------------------------------------------------------------------------------|----------------------|----------|---------|-------|-------------------|
| 1. The VPD was informative and provided a coherent learning experience.                                                                |                      |          |         |       |                   |
| 2. The VPD provided opportunities for self-assessment as a leader.                                                                     |                      |          |         |       |                   |
| 3. The VPD helped me to reflect on my teaching practice and the ways to improve it.                                                    |                      |          |         |       |                   |
| 4. The content of the VPD was very useful for me to enhance my leadership competencies.                                                |                      |          |         |       |                   |
| 5. The topics covered in the VPD helped me see another point of view of how work is performed and/or situations that occur in my work. |                      |          |         |       |                   |
| 6. The VPD has engaged me in self-improvement and continuous learning.                                                                 |                      |          |         |       |                   |
| 7. The VPD has inspired me to develop relationships with others inside and outside the school.                                         |                      |          |         |       |                   |

8. I feel I have a stronger foundation for solving the problems I am facing in my work.

9. The VPD helped me better understand some aspects of my work.

10. The VPD helped me to expand my ideas, generate new ideas and/or develop skills related to my work.

11. The VPD helped me better understand how to promote and maintain a supportive learning environment.

12. I look forward to applying the knowledge/skills that I learned from the VPD in my work.

---

## **Section B.**

Which 5 words would you most closely associate with the word "conflict"? There may be more than 5 words you associate with "conflict", but choose five words you most strongly associate with "conflict".

Engage  
Neutral  
Listener  
Avoid  
Perception  
Constructive  
Destructive  
Beliefs  
Win  
Lose  
Ideas  
Culture  
Reasonable  
Agreement  
Discussion

Viewpoints  
Dialogue  
Embrace  
Advocate  
Biases  
Collaboration  
Resistance  
Fight

**Section D.**

**Read each statement and indicate your level of confidence that in following areas:**

---

| <b>Strongly<br/>Disagree</b> | <b>Disagree</b> | <b>Neutral</b> | <b>Agree</b> | <b>Strongly<br/>Agree</b> |
|------------------------------|-----------------|----------------|--------------|---------------------------|
|------------------------------|-----------------|----------------|--------------|---------------------------|

---

1. I am confident in my general knowledge regarding the role of Emotional Intelligence in effective school leadership and management.

2. I am confident in my knowledge regarding critical dialogue.

3. I am confident in my knowledge regarding culturally responsive interventions.

4. I am confident in making culturally responsive decisions.

5. I know how to address cultural tensions that arise within the school.

6. I am confident in my knowledge regarding outcomes that are associated with school climate.

7. I know how to facilitate critical dialogue in school settings.

8. I know how to engage in difficult dialogue on bullying and/or peer-directed aggressions.

---

#### **Section D.**

**After attending the VPD, please answer the following questions relating to the topics of the conference.**

1. What leadership knowledge about conflict management did you gain from participating in the VPD?
2. What leadership skills about conflict management did you gain from participating in the VPD?
3. How did the VPD prepare you for your professional path?
